# Supplementary material
Source: PubMed Central journal article supplement (PMC3131691)
Supplement: NIHMS307149-supplement-supplemental_data.pdf [file NIHMS307149-supplement-supplemental_data.pdf]

# The extended PP1 toolkit: designed to create specificity

**Mathieu Bollen<sup>1</sup>, Wolfgang Peti<sup>2</sup>, Michael Ragusa<sup>2</sup> and Monique Beullens<sup>1</sup>**

<sup>1</sup>Laboratory of Biosignaling & Therapeutics, Department of Molecular Cell Biology, University of Leuven, B-3000 Leuven, Belgium

<sup>2</sup>Department of Molecular Pharmacology, Physiology and Biotechnology, Brown University, Providence, RI 02912, USA

Corresponding author: Bollen, M. ([Mathieu.Bollen@med.kuleuven.be](mailto:Mathieu.Bollen@med.kuleuven.be)), Peti, W. ([Wolfgang\\_Peti@brown.edu](mailto:Wolfgang_Peti@brown.edu))

Table S1. Validated vertebrate PIPs<sup>1,2</sup>.

| Protein                | Gene            | Docking motif  |      |         |                  | Function <sup>4</sup> | Reference |
|------------------------|-----------------|----------------|------|---------|------------------|-----------------------|-----------|
|                        |                 | RVxF           | SILK | MyPhoNE | IDP <sup>3</sup> |                       |           |
| AKAP149                | <i>AKAP1</i>    | +              |      |         | +                | T                     | [S1]      |
| AKAP220                | <i>AKAP11</i>   | +              |      |         | +                | T                     | [S2]      |
| AKAP450                | <i>AKAP9</i>    | +              |      |         | -                | T                     | [S3]      |
| APC                    | <i>APC</i>      | +              |      |         | +                | ?                     | [S4]      |
| Aurora-A               | <i>AURKA</i>    | +              |      |         | +                | S                     | [S5]      |
| Aurora-B               | <i>AURKB</i>    | +              |      |         | -                | ?                     | [S6]      |
| AXIN                   | <i>AXIN1</i>    | -              |      |         |                  | S                     | [S7]      |
| BCL2                   | <i>BCL2</i>     | +              |      |         | -                | T                     | [S8]      |
| BCL-w                  | <i>BCL2L2</i>   | +              |      |         | -                | T                     | [S9]      |
| BCL-x                  | <i>BCL2L1</i>   | +              |      |         | -                | T                     | [S9]      |
| BRCA1                  | <i>BRCA1</i>    | +              |      |         | +                | S                     | [S10]     |
| CASC1                  | <i>CASC1</i>    | +              |      |         | -                | ?                     | [S11]     |
| CASC5                  | <i>CASC5</i>    | +              | +    |         | +                | ?                     | [S11]     |
| Caspase 9              | <i>CASP9</i>    | -              |      |         |                  | S                     | [S12]     |
| Caspase 2 <sup>5</sup> | <i>CASP2</i>    | +              |      |         |                  | S                     | [S13]     |
| Chapsyn110             | <i>DLG2</i>     | +              |      |         | -                | ?                     | [S11]     |
| CCDC8                  | <i>CCDC8</i>    | +              |      |         | +                | ?                     | [S11]     |
| CCDC128                | <i>CCDC128</i>  | +              |      |         | +                | ?                     | [S11]     |
| CD2BP2                 | <i>CD2BP2</i>   | +              |      |         | +                | ?                     | [S11]     |
| CDC25C <sup>5</sup>    | <i>CDC25C</i>   | +              |      |         |                  | S                     | [S14]     |
| CENPE                  | <i>CENPE</i>    | +              |      |         | -                | ?                     | [S11]     |
| CEP192                 | <i>CEP192</i>   | +              |      |         | +                | ?                     | [S11]     |
| CHCHD3                 | <i>CHCHD3</i>   | +              |      |         | +                | ?                     | [S11]     |
| CHCHD6                 | <i>CHCHD6</i>   | +              |      |         | +                | ?                     | [S11]     |
| CLC7                   | <i>CLCN7</i>    | +              |      |         | +                | ?                     | [S4]      |
| Consortin              | <i>CNST</i>     | +              | +    |         | +                | ?                     | [S11]     |
| CPI-17                 | <i>PPP1R14A</i> | -              |      |         |                  | I                     | [S15]     |
| CSMD1                  | <i>CSMD1</i>    | +              |      |         | +                | ?                     | [S11]     |
| DARPP32                | <i>PPP1R1B</i>  | +              |      |         | + <sup>7</sup>   | I                     | [S16]     |
| dead box31             | <i>DDX31</i>    | +              |      |         | +                | ?                     | [S11]     |
| DNApollp68             | <i>POLD3</i>    | +              |      |         | +                | S                     | [S17]     |
| DRIM BP                | <i>KIAA0649</i> | +              |      |         | +                | ?                     | [S11]     |
| DYSFIP1                | <i>DYSFIP1</i>  | +              |      |         | -                | ?                     | [S11]     |
| DZIP3                  | <i>DZIP3</i>    | +              |      |         | +                | ?                     | [S11]     |
| eIF2β                  | <i>EIF2S2</i>   | +              |      |         | +                | ?                     | [S18]     |
| ELFN1                  | <i>ELFN1</i>    | +              |      |         | +                | ?                     | [S11]     |
| ELFN2                  | <i>ELFN2</i>    | +              |      |         | -                | ?                     | [S11]     |
| ELL1                   | <i>ELL</i>      | +              |      |         | -                | ?                     | [S11]     |
| Endofin                | <i>ZFYVE16</i>  | +              |      |         | +                | T                     | [S19]     |
| Endophilin B1t         | <i>SH3GLB1</i>  | + <sup>6</sup> |      |         | -                | ?                     | [S20]     |
| FAK                    | <i>PTK2</i>     | -              |      |         |                  | S                     | [S21]     |
| FAM130A1               | <i>FAM130A1</i> | +              | +    |         | +                | ?                     | [S11]     |
| FAM130A2               | <i>FAM130A2</i> | +              | +    |         | +                | ?                     | [S11]     |
| FER kinase             | <i>FER</i>      | +              |      |         | -                | ?                     | [S22]     |
| FERM                   | <i>FARP1</i>    | +              |      |         | +                | ?                     | [S11]     |
| FK506BP15              | <i>FKBP15</i>   | +              |      |         | +                | ?                     | [S11]     |
| FLJ14744               | <i>PPP1R15B</i> | +              |      |         | -                | ?                     | [S23]     |
| 14-3-3gamma            | <i>YWHAG</i>    | -              |      |         |                  | ?                     | [S24]     |
| GADD34                 | <i>PPP1R15A</i> | +              |      |         | +                | T                     | [S25]     |
| GBPI-1                 | <i>PPP1R14D</i> | +              |      |         | +                | I                     | [S26]     |
| GL                     | <i>PPP1R3B</i>  | +              |      |         | -                | T                     | [S27]     |
| GM                     | <i>PPP1R3A</i>  | +              |      |         | +                | T                     | [S28]     |
| GPATCH2                | <i>GPATCH2</i>  | +              |      |         | +                | ?                     | [S11]     |
| GPR12                  | <i>GPR12</i>    | +              |      |         | -                | ?                     | [S11]     |
| Glutaredoxin           | <i>GRXCR1</i>   | +              |      |         | +                | ?                     | [S11]     |
| G-substrate            | <i>C7orf16</i>  | -              |      |         |                  | I                     | [S29]     |

| Protein         | Gene             | Docking motif |      |         |                  | Function <sup>4</sup> | Reference |
|-----------------|------------------|---------------|------|---------|------------------|-----------------------|-----------|
|                 |                  | RVxF          | SILK | MyPhoNE | IDP <sup>3</sup> |                       |           |
| HB2E            | <i>PPP1R3F</i>   | +             |      |         | +                | T                     | [S23]     |
| HCF1            | <i>HCF1</i>      | -             |      |         |                  | ?                     | [S30]     |
| HDAC6           | <i>HDAC6</i>     | -             |      |         |                  | ?                     | [S31]     |
| HYDIN           | <i>HYDIN</i>     | +             |      |         | +                | ?                     | [S11]     |
| IIIg9           | <i>C11orf66</i>  | +             |      |         | +                | ?                     | [S11]     |
| Ikaros          | <i>IKZF1</i>     | +             |      |         | +                | S                     | [S32]     |
| Inhibitor-1     | <i>PPP1R1A</i>   | +             |      |         | +                | I                     | [S33]     |
| Inhibitor-2     | <i>PPP1R2</i>    | +             | +    |         | + <sup>7</sup>   | I, S                  | [S34]     |
| Inhibitor-3     | <i>PPP1R11</i>   | +             |      |         | +                | I                     | [S35]     |
| Integrin αIIb   | <i>ITGA2B</i>    | +             |      |         | +                | T                     | [S36]     |
| IP3R1           | <i>ITPR1</i>     | +             |      |         | -                | ?                     | [S4]      |
| IP3R3           | <i>ITPR3</i>     | +             |      |         | -                | ?                     | [S4]      |
| IPP5            | <i>PPP1R1C</i>   | +             |      |         | +                | I                     | [S37]     |
| IRBIT           | <i>AHCYL1</i>    | +             |      |         | +                | S                     | [S38]     |
| JARID1B         | <i>JARID1B</i>   | +             |      |         | -                | ?                     | [S11]     |
| KCNA6           | <i>KCNA6</i>     | +             |      |         | -                | ?                     | [S4]      |
| KCNK10          | <i>KCNK10</i>    | +             |      |         | -                | ?                     | [S11]     |
| KEP1            | <i>PPP1R14C</i>  | +             |      |         | +                | I                     | [S39]     |
| KIAA1244        | <i>KIAA1244</i>  | +             |      |         | -                | ?                     | [S11]     |
| KIAA1443        | <i>PPP1R3E</i>   | +             |      |         | +                | T?                    | [S23]     |
| KPI-2           | <i>LMTK2</i>     | +             |      |         | +                | ?                     | [S40]     |
| L5              | <i>RPL5</i>      | -             |      |         |                  | ?                     | [S41]     |
| LIMKAIN b1      | <i>KIAA0430</i>  | +             |      |         | -                | ?                     | [S11]     |
| LMTK1           | <i>AATK</i>      | +             |      |         | +                | T                     | [S42]     |
| LMTK3           | <i>LMTK3</i>     | +             |      |         | +                | ?                     | [S11]     |
| LOC221908       | <i>C7orf47</i>   | +             |      |         | +                | ?                     | [S11]     |
| LOC145376       | <i>C14orf50</i>  | +             |      |         | -                | ?                     | [S11]     |
| LRRC68          | <i>LRRC68</i>    | +             |      |         | +                | ?                     | [S11]     |
| MAP1B           | <i>MAP1B</i>     | +             |      |         | +                | ?                     | [S11]     |
| MCM7            | <i>MCM7</i>      | +             |      |         | -                | ?                     | [S11]     |
| mGlu1           | <i>GRM1</i>      | +             |      |         | +                | ?                     | [S43]     |
| mGlu5           | <i>GRM5</i>      | +             |      |         | +                | ?                     | [S43]     |
| mGlu7           | <i>GRM7</i>      | +             |      |         | -                | ?                     | [S43]     |
| MKI67           | <i>MKI67</i>     | +             |      |         | +                | ?                     | [S11]     |
| MPHOSPH10       | <i>MPHOSPH10</i> | +             |      |         | +                | ?                     | [S11]     |
| MYPT 1          | <i>PPP1R12A</i>  | +             |      |         | +                | T                     | [S44]     |
| MYPT 2          | <i>PPP1R12B</i>  | +             |      |         | +                | T                     | [S45]     |
| MYPT 3          | <i>PPP1R16A</i>  | +             |      |         | +                | T                     | [S46]     |
| myosin1D        | <i>MYO1D</i>     | +             |      |         | -                | ?                     | [S11]     |
| MYR 8           | <i>MYO16</i>     | +             |      |         | +                | T                     | [S47]     |
| N-Cor           | <i>NCOR1</i>     | +             |      |         | +                | S                     | [S48]     |
| NEK2a           | <i>NEK2</i>      | +             |      |         | +                | S, T                  | [S49]     |
| neurabin-I      | <i>PPP1R9A</i>   | +             |      |         | +                | T                     | [S50]     |
| neurofilament L | <i>NEFL</i>      | -             |      |         |                  | T?                    | [S51]     |
| NEZHa2          | <i>KIAA1543</i>  | +             |      |         | +                | ?                     | [S11]     |
| NHE1            | <i>SLC9A1</i>    | -             |      |         |                  | T                     | [S52]     |
| NIPP1           | <i>PPP1R8</i>    | +             |      |         | +                | ?                     | [S53]     |
| NIR             | <i>NOC2L</i>     | +             |      |         | +                | S                     | [S30]     |
| NKCC1           | <i>SLC12A2</i>   | +             |      |         | +                | T                     | [S54]     |
| NOM1            | <i>NOM1</i>      | +             |      |         | +                | S                     | [S55]     |
| Ocludin         | <i>OCN</i>       | -             |      |         | -                | ?                     | [S56]     |
| Opsin 3         | <i>OPN3</i>      | +             |      |         | -                | ?                     | [S4]      |
| ORC5L           | <i>ORC5L</i>     | +             |      |         | -                | ?                     | [S11]     |
| p53BP2          | <i>PPP1R13A</i>  | +             |      |         | +                | ?                     | [S57]     |
| p53BP2like      | <i>PPP1R13B</i>  | +             |      |         | +                | T                     | [S23]     |
| p84             | <i>PPP1R12C</i>  | +             |      |         | +                | S                     | [S58]     |

| Protein            | Gene            | Docking motif  |      |         | Function <sup>4</sup> | Reference <sup>5</sup> |
|--------------------|-----------------|----------------|------|---------|-----------------------|------------------------|
|                    |                 | RVxF           | SILK | MyPhoNE |                       |                        |
| PAR-3              | <i>PARD3</i>    | +              |      | +       | S                     | [S59]                  |
| PCIF1              | <i>PCIF1</i>    | +              |      | -       | ?                     | [S11]                  |
| PFK-1              | <i>PFKM</i>     | -              |      |         | ?                     | [S60]                  |
| PHACTR1-4          | <i>PHACTR4</i>  | -              |      |         | ?                     | [S61]                  |
| PHI-1              | <i>PPP1R14B</i> | + <sup>6</sup> |      | +       | I                     | [S62]                  |
| Phostensin         | <i>KIAA1949</i> | +              |      | +       | T                     | [S63]                  |
| PHRF1              | <i>PHRF1</i>    | +              |      | +       | ?                     | [S11]                  |
| PITK               | <i>ANKRD28</i>  | +              |      | -       | T                     | [S64]                  |
| PKMYT1             | <i>PKMYT1</i>   | +              |      | +       | ?                     | [S11]                  |
| PKR                | <i>EIF2AK2</i>  | -              |      |         | S                     | [S65]                  |
| PMP22cd            | <i>PMP22CD</i>  | +              |      | -       | ?                     | [S11]                  |
| PNUTS              | <i>PPP1R10</i>  | +              |      | +       | T                     | [S66]                  |
| pREX2              | <i>DEPDC2</i>   | +              |      | -       | ?                     | [S11]                  |
| PRIP-1             | <i>PLCL1</i>    | +              |      | +       | ?                     | [S67]                  |
| Protocadherin 7    | <i>PCDH7</i>    | +              |      | +       | ?                     | [S68]                  |
| Protocadherin11x   | <i>PCDH11X</i>  | +              |      | +       | ?                     | [S11]                  |
| PSF                | <i>SFPQ</i>     | +              |      | +       | ?                     | [S69]                  |
| PTG                | <i>PPP1R3C</i>  | +              |      | -       | T                     | [S70]                  |
| R6                 | <i>PPP1R3D</i>  | +              |      | +       | T                     | [S71]                  |
| RB                 | <i>RB1</i>      | +              |      | +       | S                     | [S72]                  |
| RB1CC1             | <i>RB1CC1</i>   | +              |      | -       | ?                     | [S4]                   |
| RBM26              | <i>RBM26</i>    | +              |      | +       | ?                     | [S11]                  |
| Repo-man           | <i>CDC42</i>    | +              |      | +       | T                     | [S73]                  |
| RIMBP2             | <i>RIMBP2</i>   | +              |      | -       | ?                     | [S11]                  |
| RPGRIP1L           | <i>RPGRIP1L</i> | +              |      | +       | ?                     | [S11]                  |
| RRP1B              | <i>RRP1B</i>    | +              |      | +       | ?                     | [S11]                  |
| Ryanodine receptor | <i>RYR1</i>     | +              |      | -       | S                     | [S74]                  |
| SACSIN             | <i>SACS</i>     | +              |      | -       | ?                     | [S11]                  |
| SARA               | <i>ZFYVE9</i>   | +              |      | -       | T                     | [S75]                  |
| SARP               | <i>ANKDR42</i>  | +              |      | +       | ?                     | [S76]                  |
| Scapinin           | <i>PHACTR3</i>  | -              |      |         | ?                     | [S77]                  |
| SDS22              | <i>PPP1R7</i>   | -              |      |         | ?                     | [S78]                  |
| SFI1               | <i>SFI1</i>     | +              |      | +       | ?                     | [S11]                  |
| SH2D4A             | <i>SH2D4A</i>   | +              |      | +       | ?                     | [S11]                  |
| SH3RF2             | <i>SH3RF2</i>   | +              |      | +       | ?                     | [S11]                  |

| Protein             | Gene            | Docking motif  |      |                | Function <sup>4</sup> | Reference <sup>5</sup> |
|---------------------|-----------------|----------------|------|----------------|-----------------------|------------------------|
|                     |                 | RVxF           | SILK | MyPhoNE        |                       |                        |
| SIPP1               | <i>WBP11</i>    | +              | +    | +              | ?                     | [S79]                  |
| SNF5                | <i>SMARCB1</i>  | + <sup>6</sup> |      | -              | ?                     | [S80]                  |
| Solute carrier 7-14 | <i>SLC7A14</i>  | +              |      | -              | ?                     | [S11]                  |
| SPATA2              | <i>SPATA2</i>   | +              |      | -              | ?                     | [S11]                  |
| Spinophilin         | <i>PPP9B</i>    | +              |      | + <sup>7</sup> | T                     | [S81]                  |
| SPOCD1              | <i>SPOCD1</i>   | +              |      | +              | ?                     | [S11]                  |
| SPRED1              | <i>SPRED1</i>   | +              |      | +              | ?                     | [S11]                  |
| SPZ1                | <i>SPZ1</i>     | -              |      |                | ?                     | [S82]                  |
| Srp38               | <i>SFRS13</i>   | -              |      |                | S                     | [S83]                  |
| Staufen             | <i>STAU</i>     | +              |      | +              | ?                     | [S84]                  |
| SAP102              | <i>DLG3</i>     | +              |      | -              | ?                     | [S11]                  |
| SYTL2               | <i>SYTL2</i>    | +              | +    | +              | ?                     | [S11]                  |
| TAU                 | <i>MAPT</i>     | -              |      |                | S                     | [S85]                  |
| Tensin 1            | <i>TNS1</i>     | +              |      | +              | ?                     | [S86]                  |
| TIMAP               | <i>PPP1R16B</i> | +              | +    | -              | T                     | [S87]                  |
| TMEM132C            | <i>TMEM132C</i> | +              |      | +              | ?                     | [S11]                  |
| TMEM132D            | <i>TMEM132D</i> | +              |      | -              | ?                     | [S11]                  |
| TRA-2BETA           | <i>TRA2B</i>    | +              |      | +              | ?                     | [S88]                  |
| TRIM42              | <i>TRIM42</i>   | +              |      | -              | ?                     | [S11]                  |
| TRPC4AP             | <i>TRPC4AP</i>  | +              |      | -              | ?                     | [S11]                  |
| TRP5                | <i>TRPC5</i>    | +              |      | +              | ?                     | [S4]                   |
| TSC2                | <i>TSC2</i>     | +              |      | +              | ?                     | [S11]                  |
| TSKS                | <i>TSKS</i>     | +              |      | +              | ?                     | [S11]                  |
| Ubinuclein 1        | <i>UBN1</i>     | +              |      | +              | ?                     | [S11]                  |
| URI                 | <i>C19orf2</i>  | -              |      |                | T                     | [S89]                  |
| Vitamin D receptor  | <i>VDR</i>      | -              |      |                | ?                     | [S90]                  |
| VPS54               | <i>VPS54</i>    | +              |      | +              | ?                     | [S11]                  |
| WDR81               | <i>WDR81</i>    | +              |      | +              | ?                     | [S11]                  |
| WNK1                | <i>WNK1</i>     | +              |      | +              | ?                     | [S11]                  |
| ZAP3                | <i>YLPM1</i>    | +              |      | +              | T                     | [S91]                  |
| ZBTB38              | <i>ZBTB38</i>   | +              |      | +              | ?                     | [S11]                  |
| ZCCHC9              | <i>ZCCHC9</i>   | +              |      | -              | ?                     | [S11]                  |
| ZFYVE1              | <i>ZFYVE1</i>   | +              |      | -              | ?                     | [S11]                  |
| ZSWIM3              | <i>ZSWIM3</i>   | +              |      | -              | ?                     | [S11]                  |

<sup>1</sup>Several additional vertebrate proteins have been found to co-purify or co-immunoprecipitate with PP1 but the available data do not allow distinguishing between direct and indirect interactors. These include the proteins ALK1, androgen receptor, C9orf75, caveolin, clathrin light chain b, EWS, GRP78, HDAC1, HDAC8, HOX11, integrin  $\alpha$ 3A, LCP1, MEF2A, myopalladin, NCAM, PDE6B, RIF1, SUR8, SRC3, TERA and TMEM113.

<sup>2</sup>The list excludes paralogues of known PP1 interactors with a conserved RVxF motif that have not yet been validated as PIPs. A list of these paralogues is given in Ref. [S11].

<sup>3</sup>Taking the available structures and biophysical data of unbound and bound PP1 regulatory proteins as a boundary blueprint, an average score from IUPRED (ASI) for  $\pm 100$  residues surrounding the F/W of the RVxF/W motif was calculated. PIPs with ASI values  $>0.45$  were considered to be disordered (+); PIPs with ASI values  $<0.45$  are marked as structured (-).

<sup>4</sup>Abbreviations. I, inhibitory PIP; IDP, intrinsically disordered protein; PIP, PP1-interacting protein; S, substrate PIP; T, targeting PIP; ?, unknown

<sup>5</sup>The validated PP1-docking motif present in the *Xenopus* or mouse isoforms is not conserved in humans.

<sup>6</sup>PIP isoforms with a conserved RVxF motif that have not been validated.

<sup>7</sup>PIPs that were experimentally confirmed as IDPs.

## References

- S1 Huang, L.J. *et al.* (1999) NH<sub>2</sub>-Terminal targeting motifs direct dual specificity A-kinase-anchoring protein 1 (D-AKAP1) to either mitochondria or endoplasmic reticulum. *J. Cell Biol.* 145, 951–959
- S2 Schillace, R.V. *et al.* (1999) Association of the type 1 protein phosphatase PP1 with the A-kinase anchoring protein AKAP220. *Curr. Biol.* 9, 321–324
- S3 Takahashi, M. *et al.* (1999) Characterization of a novel giant scaffolding protein, CG-NAP, that anchors multiple signaling enzymes to centrosome and the golgi apparatus. *J. Biol. Chem.* 274, 17267-17274
- S4 Meiselbach, H. *et al.* (2006) Structural analysis of the protein phosphatase 1 docking motif: molecular description of binding specificities identifies interacting proteins. *Chem. Biol.* 13, 49–59
- S5 Katayama, H. *et al.* (2001) Interaction and feedback regulation between STK15/BTAK/Aurora-A kinase and protein phosphatase 1 through mitotic cell division cycle. *J. Biol. Chem.* 276, 46219–46224
- S6 Sugiyama, K. *et al.* (2002) Aurora-B associated protein phosphatases as negative regulators of kinase activation. *Oncogene* 21, 3103–3111
- S7 Luo, W. *et al.* (2007) Protein phosphatase 1 regulates assembly and function of the beta-catenin degradation complex. *EMBO J.* 26, 1511–1521

- S8 Ayllón, V. *et al.* (2001) Bcl-2 targets protein phosphatase 1 alpha to Bad. *J. Immunol.* 166, 7345–7352
- S9 Ayllón, V. *et al.* (2002) The anti-apoptotic molecules Bcl-xL and Bcl-w target protein phosphatase 1alpha to Bad. *Eur. J. Immunol.* 32, 1847–1855
- S10 Hsu, L.C. (2007) Identification and functional characterization of a PP1-binding site in BRCA1. *Biochem. Biophys. Res. Commun.* 360, 507–512
- S11 Hendrickx, A. *et al.* (2009) Docking motif-guided mapping of the interactome of protein phosphatase-1. *Chem. Biol.* 16, 365–371
- S12 Dessauge, F. *et al.* (2006) Identification of PP1alpha as a caspase-9 regulator in IL-2 deprivation-induced apoptosis. *J. Immunol.* 177, 2441–2451
- S13 Nutt, L.K. *et al.* (2009) Metabolic control of oocyte apoptosis mediated by 14-3-3zeta-regulated dephosphorylation of caspase-2. *Dev. Cell* 16, 856–866
- S14 Margolis, S.S. *et al.* (2006) A role for PP1 in the Cdc2/Cyclin B-mediated positive feedback activation of Cdc25. *Mol. Biol. Cell* 17, 1779–1789
- S15 Eto, M. *et al.* (1997) Molecular cloning of a novel phosphorylation-dependent inhibitory protein of protein phosphatase-1 (CPI17) in smooth muscle: its specific localization in smooth muscle. *FEBS Lett.* 410, 356–60
- S16 Hemmings, H.C., Jr *et al.* (1984) DARPP-32, a dopamine-regulated neuronal phosphoprotein, is a potent inhibitor of protein phosphatase-1. *Nature* 310, 503–505
- S17 Gao, Y. *et al.* (2008) Protein phosphatase-1 is targeted to DNA polymerase delta via an interaction with the p68 subunit. *Biochemistry* 47, 11367–11376
- S18 Wakula, P. *et al.* (2006) The translation initiation factor eIF2beta is an interactor of protein phosphatase-1. *Biochem. J.* 400, 377–383
- S19 Shi, W. *et al.* (2007) Endofin acts as a Smad anchor for receptor activation in BMP signaling. *J. Cell Sci.* 120, 1216–1224
- S20 Hrabchak, C. *et al.* (2007) A testis specific isoform of endophilin B1, endophilin B1t, interacts specifically with protein phosphatase-1c gamma2 in mouse testis and is abnormally expressed in PP1c gamma null mice. *Biochemistry* 46, 4635–4644
- S21 Bianchi, M. *et al.* (2005) Regulation of FAK Ser-722 phosphorylation and kinase activity by GSK3 and PP1 during cell spreading and migration. *Biochem. J.* 391, 359–370
- S22 Pasder, O. *et al.* (2006) Downregulation of Fer induces PP1 activation and cell-cycle arrest in malignant cells. *Oncogene* 25, 4194–4206

- S23 Ceulemans, H. *et al.* (2002) Regulator-driven functional diversification of protein phosphatase-1 in eukaryotic evolution. *BioEssays* 24, 371–381
- S24 Platholi, J., *et al.* (2008) Activation of brain protein phosphatase-1(I) following cardiac arrest and resuscitation involving an interaction with 14-3-3 gamma. *J. Neurochem.* 105, 2029–2038
- S25 Novoa, I. *et al.* (2001) Feedback inhibition of the unfolded protein response by GADD34-mediated dephosphorylation of eIF2alpha. *J. Cell Biol.* 153, 1011–1022
- S26 Liu, Q.R. *et al.* (2004) GBPI, a novel gastrointestinal- and brain-specific PP1-inhibitory protein, is activated by PKC and inactivated by PKA. *Biochem. J.* 377, 171–181
- S27 Doherty, M.J. *et al.* (1995) Amino acid sequence and expression of the hepatic glycogen-binding (GL)-subunit of protein phosphatase-1. *FEBS Lett.* 375, 294–298
- S28 Johnson, D.F. *et al.* (1996) Identification of protein phosphatase-1-binding domains on the glycogen and myofibrillar targeting subunits. *Eur. J. Biochem.* 239, 317–325
- S29 Hall, K.U. *et al.* (1999) Phosphorylation-dependent inhibition of protein phosphatase-1 by G-substrate. A Purkinje cell substrate of the cyclic GMP-dependent protein kinase. *J. Biol. Chem.* 274, 3485–3495
- S30 Ajuh, P.M. *et al.* (2000) Association of a protein phosphatase 1 activity with the human factor C1 (HCF) complex. *Nucleic Acids Res.* 28, 678–686
- S31 Brush, M.H. *et al.* (2004) Deacetylase inhibitors disrupt cellular complexes containing protein phosphatases and deacetylases. *J. Biol. Chem.* 279, 7685–7691
- S32 Popescu, M. *et al.* (2009) Ikaros stability and pericentromeric localization are regulated by protein phosphatase 1. *J. Biol. Chem.* 284, 13869–13880
- S33 Endo, S. *et al.* (1996) Multiple structural elements define the specificity of recombinant human inhibitor-1 as a protein phosphatase-1 inhibitor. *Biochemistry* 35, 5220–5228
- S34 Hurley, T.D. *et al.* (2007) Structural basis for regulation of protein phosphatase 1 by inhibitor-2. *J. Biol. Chem.* 282, 28874–28883
- S35 Zhang, J. *et al.* (1998) Identification and characterization of the human HCG V gene product as a novel inhibitor of protein phosphatase-1. *Biochemistry* 37, 16728–16734
- S36 Gushiken, F.C. *et al.* (2009) The catalytic subunit of protein phosphatase 1 gamma regulates thrombin-induced murine platelet alpha(IIb)beta(3) function. *PLoS ONE* 4, e8304

- S37 Wang, X. *et al.* (2008) IPP5, a novel protein inhibitor of protein phosphatase 1, promotes G1/S progression in a Thr-40-dependent manner. *J. Biol. Chem.* 283, 12076–12084
- S38 Devogelaere, B. *et al.* (2007) Protein phosphatase-1 is a novel regulator of the interaction between IRBIT and the inositol 1,4,5-trisphosphate receptor. *Biochem. J.* 407, 303–311
- S39 Liu, Q.R. *et al.* (2002) KEPI, a PKC-dependent protein phosphatase 1 inhibitor regulated by morphine. *J. Biol. Chem.* 277, 13312–13320
- S40 Wang, H. *et al.* (2002) A novel transmembrane Ser/Thr kinase complexes with protein phosphatase-1 and inhibitor-2. *J. Biol. Chem.* 277, 49605–49612
- S41 Hirano, K. *et al.* (1995) Interaction of the ribosomal protein, L5, with protein phosphatase type 1. *J. Biol. Chem.* 270, 19786–19790
- S42 Gagnon, K.B. *et al.* (2007) Apoptosis-associated tyrosine kinase scaffolding of protein phosphatase 1 and SPAK reveals a novel pathway for Na-K-2C1 cotransporter regulation. *Am. J. Physiol. Cell Physiol.* 292, 1809–1815
- S43 Croci, C. *et al.* (2003) Group I metabotropic glutamate receptors bind to protein phosphatase 1C. Mapping and modeling of interacting sequences. *J. Biol. Chem.* 278, 50682–50690
- S44 Terrak, M. *et al.* (2004) Structural basis of protein phosphatase 1 regulation. *Nature* 429, 780–784
- S45 Moorhead, G. *et al.* (1998) The major myosin phosphatase in skeletal muscle is a complex between the beta-isoform of protein phosphatase 1 and the MYPT2 gene product. *FEBS Lett.* 438, 141–144
- S46 Skinner, J.A. *et al.* (2001) Cloning and identification of MYPT3: a prenylatable myosin targeting subunit of protein phosphatase 1. *Biochem. J.* 356, 257–267
- S47 Patel, K.G. *et al.* (2001) Myr 8, a novel unconventional myosin expressed during brain development associates with the protein phosphatase catalytic subunits 1alpha and 1gamma1. *J. Neurosci.* 21, 7954–7968
- S48 Hermanson, O. *et al.* (2002) N-CoR controls differentiation of neural stem cells into astrocytes. *Nature* 419, 934–939
- S49 Helps, N.R. *et al.* (2000) NIMA-related kinase 2 (Nek2), a cell-cycle-regulated protein kinase localized to centrosomes, is complexed to protein phosphatase 1. *Biochem. J.* 349, 509–518

- S50 McAvoy, T. *et al.* (1999) Regulation of neurabin I interaction with protein phosphatase 1 by phosphorylation. *Biochemistry* 38, 12943–12949
- S51 Terry-Lorenzo, R.T. *et al.* (2000) Neurofilament-L is a protein phosphatase-1-binding protein associated with neuronal plasma membrane and post-synaptic density. *J. Biol. Chem.* 275, 2439-2446
- S52 Misik, A.J. *et al.* (2005) Protein phosphatase regulation of Na<sup>+</sup>/H<sup>+</sup> exchanger isoform I. *Biochemistry* 44, 5842–5852
- S53 Beullens, M. *et al.* (2000) The C-terminus of NIPP1 (nuclear inhibitor of protein phosphatase-1) contains a novel binding site for protein phosphatase-1 that is controlled by tyrosine phosphorylation and RNA binding. *Biochem. J.* 352, 651–658
- S54 Darman, R.B. *et al.* (2001) Modulation of ion transport by direct targeting of protein phosphatase type 1 to the Na-K-Cl cotransporter. *J. Biol. Chem.* 276, 34359–34362
- S55 Gunawardena, S.R. *et al.* (2008) NOM1 targets protein phosphatase I to the nucleolus. *J. Biol. Chem.* 283, 398–404
- S56 Seth, A. *et al.* (2007) Protein phosphatases 2A and 1 interact with occludin and negatively regulate the assembly of tight junctions in the CACO-2 cell monolayer. *J. Biol. Chem.* 282, 11487–11498
- S57 Helps, N.R. *et al.* (1995) Protein phosphatase 1 interacts with p53BP2, a protein which binds to the tumour suppressor p53. *FEBS Lett.* 377, 295–300
- S58 Tan, I. *et al.* (2001) Phosphorylation of a novel myosin binding subunit of protein phosphatase 1 reveals a conserved mechanism in the regulation of actin cytoskeleton. *J. Biol. Chem.* 276, 21209–21216
- S59 Traweger, A. *et al.* (2008) Protein phosphatase 1 regulates the phosphorylation state of the polarity scaffold Par-3. *Proc. Natl. Acad. Sci. U. S. A.* 105, 10402–10407
- S60 Zhao, S. *et al.* (1997) Targeting of the catalytic subunit of protein phosphatase-1 to the glycolytic enzyme phosphofructokinase. *Biochemistry* 36, 8318–8324
- S61 Sagara, J. *et al.* (2003) Scapinin, a putative protein phosphatase-1 regulatory subunit associated with the nuclear nonchromatin structure. *J. Biol. Chem.* 278, 45611–45619
- S62 Eto, M. *et al.* (1999) A novel phosphoprotein inhibitor of protein type-1 phosphatase holoenzymes. *Biochemistry* 38, 16952–16957
- S63 Kao, S.C. *et al.* (2007) Identification of phostensin, a PP1 F-actin cytoskeleton targeting subunit. *Biochem. Biophys. Res. Commun.* 356, 594–598
- S64 Kwiek, N.C. *et al.* (2006) PITK, a PP1 targeting subunit that modulates the phosphorylation of the transcriptional regulator hnRNP K. *Cell Signal.* 18, 1769–1778



- S65 Tan, S.L. *et al.* (2002) The direct binding of the catalytic subunit of protein phosphatase 1 to the PKR protein kinase is necessary but not sufficient for inactivation and disruption of enzyme dimer formation. *J. Biol. Chem.* 277, 36109–36117
- S66 Kreivi, J.P. (1997) Purification and characterisation of p99, a nuclear modulator of protein phosphatase 1 activity. *FEBS Lett.* 420, 57–62
- S67 Yoshimura, K. *et al.* (2001) Interaction of p130 with, and consequent inhibition of, the catalytic subunit of protein phosphatase 1alpha. *J. Biol. Chem.* 276, 17908–17913
- S68 Yoshida, K. *et al.* (1999) BH-protocadherin-c, a member of the cadherin superfamily, interacts with protein phosphatase 1 alpha through its intracellular domain. *FEBS Lett.* 460, 93–98
- S69 Hirano, K. *et al.* (1996) Interaction of protein phosphatase type 1 with a splicing factor. *FEBS Lett.* 389, 191–194
- S70 Brady, M.J. *et al.* (1997) Role of protein targeting to glycogen (PTG) in the regulation of protein phosphatase-1 activity. *J. Biol. Chem.* 272, 20198–20204
- S71 Armstrong, C.G. *et al.* (1997) PPP1R6, a novel member of the family of glycogen-targetting subunits of protein phosphatase 1. *FEBS Lett.* 418, 210–214
- S72 Durfee, T. *et al.* (1993) The retinoblastoma protein associates with the protein phosphatase type 1 catalytic subunit. *Genes Dev.* 7, 555–569
- S73 Trinkle-Mulcahy, L. *et al.* (2006) Repo-Man recruits PP1 gamma to chromatin and is essential for cell viability. *J. Cell Biol.* 172, 679–692
- S74 Zhao, S. *et al.* (1998) Binding of the catalytic subunit of protein phosphatase-1 to the ryanodine-sensitive calcium release channel protein. *Biochemistry* 37, 18102–18109
- S75 Shi, W. *et al.* (2004) GADD34–PP1c recruited by Smad7 dephosphorylates TGFβ type I receptor. *J. Cell Biol.* 164, 291–300
- S76 Browne, G.J. *et al.* (2007) SARP, a new alternatively spliced protein phosphatase 1 and DNA interacting protein. *Biochem. J.* 402, 187–196
- S77 Sagara, J. *et al.* (2003) Scapinin, a putative protein phosphatase-1 regulatory subunit associated with the nuclear nonchromatin structure. *J. Biol. Chem.* 278, 45611–45619
- S78 Ohkura, H. *et al.* (1991) S. pombe gene sds22+ essential for a midmitotic transition encodes a leucine-rich repeat protein that positively modulates protein phosphatase-1. *Cell* 64, 149–157
- S79 Llorian, M. *et al.* (2004) SIPP1, a novel pre-mRNA splicing factor and interactor of protein phosphatase-1. *Biochem. J.* 378, 229–238

- S80 Wu, D.U. (2002) The human SNF5/INI1 protein facilitates the function of the growth arrest and DNA damage-inducible protein (GADD34) and modulates GADD34-bound protein phosphatase-1 activity. *J. Biol. Chem.* 277, 27706–27715
- S81 Allen, P.B. et al. (1997) Spinophilin, a novel protein phosphatase 1 binding protein localized to dendritic spines. *Proc. Natl. Acad. Sci. U.S.A.* 94, 9956–9961
- S82 Hrabchak, C. and Varmuza, S. (2004) Identification of the spermatogenic zip protein Spz1 as a putative protein phosphatase-1 (PP1) regulatory protein that specifically binds the PP1c $\gamma$ 2 splice variant in mouse testis. *J. Biol. Chem.* 279, 37079–37086
- S83 Shi, Y. and Manley, J.L. (2007) A complex signaling pathway regulates SRp38 phosphorylation and pre-mRNA splicing in response to heat shock. *Mol. Cell* 28, 79–90
- S84 Monshausen, M. et al. (2002) The RNA-binding protein Staufin from rat brain interacts with protein phosphatase-1. *J. Neurochem.* 81, 557–564
- S85 Liao, H. et al. (1998) Protein phosphatase 1 is targeted to microtubules by the microtubule-associated protein Tau. *J. Biol. Chem.* 273, 21901–21908
- S86 Eto, M. et al. (2007) Association of the tensin N-terminal protein-tyrosine phosphatase domain with the alpha isoform of protein phosphatase-1 in focal adhesions. *J. Biol. Chem.* 282, 17806–17815
- S87 Kim, K. et al. (2005) The protein phosphatase-1 targeting subunit TIMAP regulates LAMR1 phosphorylation. *Biochem. Biophys. Res. Commun.* 338, 1327–1334
- S88 Novoyatleva, T. et al. (2008) Protein phosphatase 1 binds to the RNA recognition motif of several splicing factors and regulates alternative pre-mRNA processing. *Hum. Mol. Genet.* 17, 52–70
- S89 Djouder, N. et al. (2007) S6K1-mediated disassembly of mitochondrial URI/PP1 $\gamma$  complexes activates a negative feedback program that counters S6K1 survival signaling. *Mol. Cell* 28, 28–40
- S90 Bettoun, D.J. et al. (2002) A vitamin D receptor-Ser/Thr phosphatase-p70 S6 kinase complex and modulation of its enzymatic activities by the ligand. *J. Biol. Chem.* 277, 24847–24850
- S91 Ulke-Lemée, A. et al. (2007) The nuclear PP1 interacting protein ZAP3 (ZAP) is a putative nucleoside kinase that complexes with SAM68, CIA, NF110/45, and HNRNP-G. *Biochim. Biophys. Acta* 1774, 1339–1350
